# Supplementary material for: Bridging the spatial gaps of the Ammonia Monitoring Network using satellite ammonia measurements
Source: Copernicus journal article supplement (doi:10.5194/egusphere-2023-190), 2023-03-15
Supplement: Supplementary file [file egusphere-2023-190-AC1-supplement.pdf]

Response to Review#1

Title: “Bridging the spatial gaps of the Ammonia Monitoring Network using satellite ammonia measurements”

Authors: R. Wang et al.

We thank the reviewer for the helpful comments, careful review, and valuable suggestions of the entire manuscript. We have revised the manuscript accordingly to help clarify and focus the manuscript. The original comments from reviewers are in *blue and italics*, our replies are in black font, and verbatim responses from the revised manuscript are in **red font**.

### **Summary**

*Multiple observations, both ground based and from satellites, strongly suggest that NH<sub>3</sub> concentrations are increasing; these increases will significantly impact ecosystems, air quality and human health. This paper presents the results of an important study that demonstrates the validity of using NH<sub>3</sub> data from IASI instruments to extend the limited information available from surface monitoring networks. This is an important capability, since surface networks are in general sparse, or in many regions, non-existent. The authors compare IASI NH<sub>3</sub> columns with the two week surface means from the North American AMoN network and show that the IASI and AMoN data are mostly well correlated, as long as there is good temporal coverage by IASI during the two week AMoN measurement period and only IASI data within 25 km of the AMoN site are used. They then calculate trends from both datasets and show that they are comparable. Having established that IASI and AMoN data provide similar trends, they use the IASI data to calculate trends across the CONUS region, both annually and seasonally. They find that NH<sub>3</sub> is increasing faster than 10%·yr<sup>-1</sup> in the eastern U.S. and Midwest in the spring and in the western U.S. in the summer. Trends in NH<sub>3</sub> “hotspots” (e.g., central Iowa), and urban areas (e.g. New York), which are mostly far from any AMoN site, are also shown to be positive and significant. The paper is very well organized and the results are certainly important. There are some sections that could be more clearly written, as I have detailed below. I recommend the paper be published with minor revisions.*

### **Presentation issues**

Section 2.2: *the authors state that they used AMoN data for all sites except UT01. This is true for the correlation analysis, but not the trend analysis, which used a much more limited set, as is explained later. This should be made clear in section 2.3.2.*

Response: we added a sentence in section 2.2 to clarify the dataset used for trend analyses:

Line 215: **We include AMoN trend analysis only for sites with full year coverage during 2008 - 2018 (N=13).**

Section 2.3.1: *were the maps really created using the data for entire 2008-2018 period? Based on the discussion in section 4 it seems that they were created for each month of each year, which would be the only way to generate Figure 5. Or maybe multiple versions of the maps were created and used for different estimates? Please make this clear.*

Response: In Figure 5 (a), monthly averaged AMoN and IASI NH<sub>3</sub> time series within 25 km of the AMoN location are used for visualization. For the seasonal trend analyses, to achieve a higher spatial resolution (~ 2 km), seasonally oversampling maps are generated for spring (March, April, and May, MAM),

summer (June, July, and August, JJA), fall (September, October, and November, SON), and winter (December, January, and February, DJF) for each year. We've changed the text in section 4.1 to clarify the different versions of maps used in the manuscript.

Fig. 5 shows monthly **averaged** IASI and AMoN time series from Indianapolis, Indiana, USA (IN 99).

**Line 435 - 439:** Here we will compare IASI NH<sub>3</sub> trends with the AMoN observed NH<sub>3</sub> trends in the CONUS over the last decade. We include AMoN trend analysis only for sites with full year coverage during 2008 - 2018 (N=13). To achieve a higher spatial resolution, in the following study, we used the oversampled IASI NH<sub>3</sub> maps for trend analyses at 2 km scale. A long-term trend analysis was then performed using AMoN and IASI oversampled data (Sun et al., 2018; Wang et al., 2021) by Theil-Sen's slope estimator and MK test to examine the agreement between the datasets and explore any regional differences.

*Section 2.3.2: the authors state that they use the Mann-Kendall test and the Theil-Sen slope estimator for trend analyses. This is a good approach, but never again do they mention either technique. The reader is left to assume that the Theil-Sen slope estimator is used in the trend analysis section, and it's not clear where the Mann-Kendall test is used at all, since all the correlations are presented as Pearson coefficients. If the Mann-Kendall test and the Theil-Sen slope estimator are only used in the trend section, please make this clear, and then provide a few sentences demonstrating how they are applied.*

**Response:** The Pearson's r values are used for the comparison between IASI and AMoN in Section 3. The MK test and Theil-Sen slope estimator are used only for trend analysis in Section 4. MK test is used to determine the significance level of observed trends. We've changed the text in Section 3. to clarify that.

**Line 247 - 248:** In this study, Theil-Sen's slope was used to estimate 2008 – 2018 NH<sub>3</sub> trends, and the MK test was used to derive the significance level of trends.

**Line 437 - 439:** A long-term trend analysis was then performed using AMoN and IASI oversampled data (Sun et al., 2018; Wang et al., 2021) by Theil-Sen's slope estimator and MK test to examine the agreement between the datasets and explore any regional differences.

*Tables 2 and 3: it seems that the first row captions have been switched between Tables 2 and 3. And please define pair. Does it mean all the IASI pixels co-located with an AMoN site during one two week period? It would be better to say: AMoN-IASI pair. Or add the following on line 238: ... for comparison, establishing an AMoN-IASI pair.*

**Response:** Table 2 and 3 show the impact of temporal coverage and number of IASI pixels, respectively. "Pair" means each AMoN sample with co-located IASI pixels. We've added the definition for pair and changed the text to AMoN-IASI pairs in Table 1, 2, 3, and 4 for clarification.

**Line 255:** We define each AMoN sample with co-located IASI pixels as an AMoN-IASI pair.

Section 3.3: *Please provide the correlations between IASI and AMoN for all four seasons and not just winter. Please clarify how Figure 4 was obtained. The text suggest that IASI data were oversampled over the entire 2008-2018 period. I don't see how correlations can be calculated, since such oversampled would have no temporal information. Was the oversampling done on a month by month basis? This point is key for understanding how the results in section 4 were obtained. I suggest a scatter plot of the AMoN median values and the Pearson coefficient. This would reinforce the conclusions in the paragraph starting at line 360.*

*The section in the last paragraph in section 3.3 starting at line 377 (However, ...) jumps ahead to discuss results in the next section. I think the authors should move this text to the next section, and use the plot I suggested above here to make the points stated at the beginning of this paragraph.*

Response: We've added the correlations between IASI and AMoN for all four seasons. Figure 4 shows multi-year averaged NH<sub>3</sub> seasonality comparison results between AMoN sites and the IASI observations using 25 km spatial window, which means we ignore the interannual variability of NH<sub>3</sub> seasonality and calculate averaged IASI and AMoN NH<sub>3</sub> seasonality during 2008 – 2018. The oversampling products are only used for trend analyses in Section 4 to achieve a higher spatial resolution, not for the comparison results in Section 3. We've added the scatter plot suggested by the reviewer as Figure 4(b) and changed the text. We agree with the reviewer that having the seasonality regression plots in Section 4 causes confusion and we've rearranged the regression plots for individual AMoN sites to Figure 4.

Line 371 - 373: When temporal coverage is at least 80%, IASI wintertime data still have good agreement with AMoN ( $r = 0.61$ ) although the comparison is limited to only a few AMoN & IASI pairs ( $N = 33$ ). The  $r$  values for spring, summer, and autumn when temporal coverage  $\geq 80\%$  are 0.60 ( $N = 181$ ), 0.76 ( $N = 502$ ), and 0.70 ( $N = 283$ ), respectively.

Line 229 - 231: The oversampling products are only used for the trend analyses in Section 4 to achieve a high spatial resolution. For IASI and AMoN comparison results in Section 3, the oversampling products are not used since it sacrifices the temporal resolution.

Line 435 - 438: Here we will compare IASI NH<sub>3</sub> trends with the AMoN observed NH<sub>3</sub> trends in the CONUS over the last decade. We include AMoN trend analysis only for sites with full year coverage during 2008 - 2018 ( $N = 13$ ). To achieve a higher spatial resolution, in the following study, we used the oversampled IASI NH<sub>3</sub> maps to calculate NH<sub>3</sub> trend for each 2 km grid box.

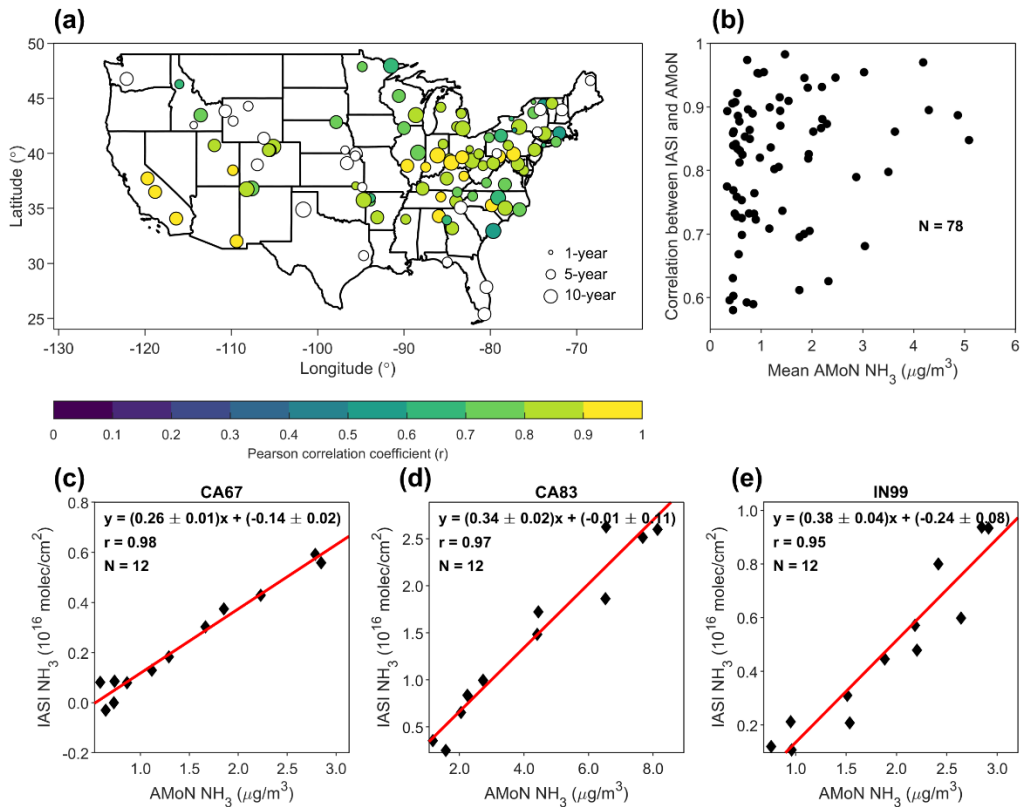

**Figure 4.** (a) Multi-year averaged  $\text{NH}_3$  seasonality comparison results between AMoN sites and the IASI observations within 25 km of the AMoN sites at monthly resolution. Circles without filled color denote the AMoN sites with no statistically significant correlation with IASI ( $\alpha = 0.05$ ). The circle sizes denote the length of AMoN data record; (b) The relationship between mean AMoN  $\text{NH}_3$  concentrations and the correlation between AMoN and IASI seasonality; The regression between IASI and AMoN observed  $\text{NH}_3$  seasonality for (c) the AMoN site in Joshua Tree National Park, California (CA67), (d) the AMoN site in Sequoia National Park, California, and (e) the AMoN site in Indianapolis, Indiana (IN99).

**Section 4:** Please provide more detail on the calculation of the trends: were the trends calculated on each 2 km grid box, how long were the averaging time periods, how were the IASI trends averaged to compare with AMoN trends, how were the IASI data averaged to provide regional, hotspot and CONUS trends. This information is critical for understanding the results discussed in section 4.1 and 4.2. For example, it's hard to understand how the CONUS trend can be 3.9%/yr (line 428), 8.0%/yr (line 436) and 6.8%/yr (line 528). Either there is an error or these three values are calculated differently, but it's not clear what the difference is.

**Response:** The trends were calculated on 2 km oversampling grid box. For the annual trends, oversampled maps were generated for each year and for the seasonal trends, oversampled maps were generated for each year for each season. For the comparison between IASI and AMoN trends, a 25 km spatial window is used. We used two different approaches to show the importance of high resolution  $\text{NH}_3$  maps. The first method is considering the CONUS as a whole to calculate an averaged  $\text{NH}_3$  concentration for each year to perform trend analysis, which is 3.9%  $\cdot$  yr<sup>-1</sup>. The second method is calculating  $\text{NH}_3$  trends for each 2 km

grid box and then use the median value of all grid boxes to represent CONUS trend, which is  $6.8\% \cdot \text{yr}^{-1}$ . The value  $8.0\% \cdot \text{yr}^{-1}$  was a typo and should be  $6.8\% \cdot \text{yr}^{-1}$ , and we apologize for the typo that caused the confusion. We've changed the text for clarification and corrected the numbers for trend analyses.

Line 221 - 231: From 2008 to 2018, a  $0.02^\circ \times 0.02^\circ$  ( $\sim 2$  km) annual mean  $\text{NH}_3$  map in the CONUS was created each year based on a physical oversampling algorithm that represents the satellite spatial response functions as generalized 2-D super Gaussian functions (Sun et al., 2018). This algorithm weighs IASI measurements by their uncertainties, which include varying sensitivities to thermal contrast as described in Sun et al. (2018) and Wang et al. (2021). **To evaluate the seasonal trends**, for each year, seasonally averaged oversampling maps were also generated for spring (March, April, and May, MAM), summer (June, July, and August, JJA), fall (September, October, and November, SON), and winter (December, January, and February, DJF). For each season, we were able to achieve sufficiently overlapped IASI pixels through calculating the sum of the unnormalized spatial response function (SRF) of the oversampling results. **A large sum of unnormalized SRF means the Level 3 grid is covered by more Level 2 pixels. Sun et al. 2018 and Wang et al. 2021 have a detailed description of SRF. The oversampling products are only used for the trend analyses in Section 4 to achieve a high spatial resolution. For IASI and AMoN comparison results in Section 3, the oversampling products are not used since it scarifies the temporal resolution.**

Line 446 - 447: When plotting the trends of AMoN sites against the median of IASI trends within a 25 km spatial window (Fig. 7), a moderate correlation ( $r = 0.66$ ) was found between IASI and AMoN  $\text{NH}_3$  trends.

Line 459 - 463: **Here we note that the spatial resolution could affect the results of trend analyses. The trend  $6.8\% \cdot \text{yr}^{-1}$  was derived as the median of trends for each 2 km grid box.** If considering the CONUS as a whole and calculating the annual mean  $\text{NH}_3$  for the whole CONUS during 2008 – 2018 to derive the overall trend in CONUS, the IASI  $\text{NH}_3$  change for 2008 – 2018 is  $(3.9 \pm 2.2) \% \cdot \text{yr}^{-1}$  and  $(1.3 \pm 0.8) \times 10^{14} \text{ molec/cm}^2 \cdot \text{yr}^{-1}$ , similar with the trend in the previous study  $(3.4 \pm 0.6) \% \cdot \text{yr}^{-1}$  and  $(1.1 \pm 0.4) \times 10^{14} \text{ molec/cm}^2 \cdot \text{yr}^{-1}$  (Van Damme et al., 2021).

Line 472: Although the percent changes in the regions with the highest concentrations are smaller **than** the trend in **the** CONUS median ( $6.8\% \cdot \text{yr}^{-1}$ ) ...

Line 537: The urban areas have a similar  $\text{NH}_3$  trend compared with CONUS ( $8.1\% \cdot \text{yr}^{-1}$  vs.  $6.8\% \cdot \text{yr}^{-1}$ ) ...

Figure 5: *It would be interesting to show this figure for a few more sites; this would provide the reader with an idea of the variability in the slope and correlation; the sites mentioned at the end of section 3 (CA67 and CA 83) should be shown and could be discussed here.*

Response: We've added the regression plots for CA67 and CA83 as Figure 4(c) and (d).



**Figure 4.** (a) Multi-year averaged NH<sub>3</sub> seasonality comparison results between AMoN sites and the IASI observations within 25 km of the AMoN sites at monthly resolution. Circles without filled color denote the AMoN sites with no statistically significant correlation with IASI ( $\alpha = 0.05$ ). The circle sizes denote the length of AMoN data record; (b) The relationship between mean AMoN NH<sub>3</sub> concentrations and the correlation between AMoN and IASI seasonality; The regression between IASI and AMoN observed NH<sub>3</sub> seasonality for (c) the AMoN site in Joshua Tree National Park, California (CA67), (d) the AMoN site in Sequoia National Park, California, and (e) the AMoN site in Indianapolis, Indiana (IN99).

**Figure 6:** *are the IASI trends calculated in each 2 km grid box? What is the spatial extent of each “hotspot” box?*

**Response:** IASI trends are calculated in each 2 km grid box. We use Hoshen–Kopelman algorithm to cluster adjacent grid points above the 95<sup>th</sup> percentile threshold as a hotspot (Hoshen & Kopelman, 1976), and the median area of identified hotspots is  $\sim 150 \text{ km}^2$  (Wang et al., 2021).

**Line 436 - 437:** To achieve a higher spatial resolution, in the following study, we used the oversampled IASI NH<sub>3</sub> maps to calculate NH<sub>3</sub> trend for each 2 km grid box.

**Line 466 - 469:** We use Hoshen–Kopelman algorithm to cluster adjacent grid points above the 95<sup>th</sup> percentile threshold of the 11-year CONUS oversampling map ( $6.7 \times 10^{15} \text{ molec/cm}^2$ ) as a NH<sub>3</sub> hotspot (Hoshen & Kopelman, 1976; Wang et al., 2021), and the median area of identified hotspots is  $\sim 150 \text{ km}^2$  (Wang et al., 2021).

## Minor revisions

Line 17: *The limited number of NH<sub>3</sub> observations hinders ...*

Response: We've changed the text based on the reviewer's suggestion:

Line 17: The limited **number** of NH<sub>3</sub> **observations** hinders...

Line 19: *...networks are few and sparse across most of the globe,*

Response: We've changed the text based on the reviewer's suggestion:

Line 18: are **few and sparse** across **most of** the globe...

Line 34: *(2008-2018), suggesting the NH<sub>3</sub> will become a greater contributor to nitrogen deposition. NH<sub>3</sub> trends at AMoN sites are correlated with IASI NH<sub>3</sub> trends (r=0.6), and show similar spatial patterns, with the highest increases in the Midwest and eastern U.S*

Response: We've changed the text based on the reviewer's suggestion:

Line 33 - 35: **suggesting the NH<sub>3</sub> will become a greater contributor to nitrogen deposition. NH<sub>3</sub> trends at AMoN sites are correlated with IASI NH<sub>3</sub> trends (r = 0.66), and show similar spatial patterns, with the highest increases in the Midwest and eastern U.S.**

Line 37: *respectively. NH<sub>3</sub> hotpots (defined as regions where the IASI NH<sub>3</sub> column is larger than the 95<sup>th</sup> percentile of 11-year CONUS map,  $6.7 \text{ \AA} \sim 10^{15} \text{ molec/cm}^2$ ), are also experiencing increasing concentrations over time, with a median of NH<sub>3</sub> trend of  $4.7\% \cdot \text{yr}^{-1}$ .*

Response: We've changed the text based on the reviewer's suggestion:

Line 39 - 42: NH<sub>3</sub> hotpots (defined as regions where the IASI NH<sub>3</sub> column is larger than the 95<sup>th</sup> percentile of 11-year CONUS map,  $6.7 \times 10^{15} \text{ molec/cm}^2$ ), also experiencing increasing concentrations over time, with **a** median of NH<sub>3</sub> trend **of**  $4.7\% \cdot \text{yr}^{-1}$ .

Line 42: *The increases in NH<sub>3</sub> ...*

Response: We've changed the text based on the reviewer's suggestion:

Line 43: The increases **in** NH<sub>3</sub>

Line 43: *areas, and therefore should be carefully monitored and studied.*

Response: We've changed the text based on the reviewer's suggestion:

Line 44 - 45: areas, **and therefore should be carefully monitored and studied.**

Line 52: *NH<sub>4</sub>NO<sub>3</sub>*

Response: We've changed the text based on the reviewer's suggestion:

Line 53: NH<sub>4</sub>NO<sub>3</sub>

Line 55: *emissions are decreasing under new pollution controls*

Response: We've changed the text based on the reviewer's suggestion:

Line 60: NO<sub>x</sub> emissions **are decreasing** under **new** pollution controls

Line 58: *in sensitive ecosystems.*

Response: We've changed the text based on the reviewer's suggestion:

Line 62: especially in sensitive ecosystems

Line 79: *Move definition of IMPROVE to this line.*

Response: We've moved the definition of IMPROVE:

Line 83: synthesizing the AMoN NH<sub>3</sub> data with other ground monitoring networks, e.g., **the Interagency Monitoring of Protected Visual Environments (IMPROVE)**

Line 85: *hotspot regions*

Response: We've changed the text based on the reviewer's suggestion:

Line 90: **hotspot** regions

Line 94: *(S-NPP) and on JPSS-1 and JPSS-2*

Response: We've changed the text based on the reviewer's suggestion:

Line 99 – 100: Cross-track Infrared Sounder (CrIS) on NOAA and NASA Suomi National Polar-orbiting Partnership (S-NPP) **and on Joint Polar Satellite System-1 and -2 (JPSS-1 and -2)**

Line 113: *validation efforts were carried out in specific seasons*

Response: We've changed the text based on the reviewer's suggestion:

Line 118: All of these validation works were **carried out** in **specific** seasons

Line 126: *in the atmosphere is limited*

Response: We've changed the text based on the reviewer's suggestion:

Line 133: in the atmosphere **is** limited

Line 146: *in more detail.*

Response: We've changed the text based on the reviewer's suggestion:

Line 152: needs to be examined in more **detail.**

Line 167: *on bi-weekly/seasonal*

Response: We've changed the text based on the reviewer's suggestion:

Line 174: between IASI and AMoN on **bi-weekly/seasonal** scales

Line 169: *We avoided converting column NH<sub>3</sub> into surface concentrations*

Response: We've changed the text based on the reviewer's suggestion:

Line 175 - 176: We avoided converting column NH<sub>3</sub> into surface concentrations...



Line 178: *sounder deployed on board*

Response: We've changed the text based on the reviewer's suggestion:

Line 184: IASI is an infrared sounder **deployed** on board of

Line 183: *The latest version is a reanalysis dataset that uses the European ....*

Response: We've changed the text based on the reviewer's suggestion:

Line 189 - 190: The latest version **is** a reanalyzed dataset **that uses** the

Line 185: *Because these meteorological data are coherent in time, the reanalyzed NH<sub>3</sub> dataset is the most appropriate one to study trends.*

Response: We've changed the text based on the reviewer's suggestion:

Line 191- 192: Because these **se** meteorological **data are** coherent in time, **the reanalysis dataset** it is the **most** appropriate dataset to study trends.

Line 200: *imagery, we determined*

Response: We've changed the text based on the reviewer's suggestion:

Line 207: Using satellite imagery, we **determined** that

Line 214: *this algorithm weights IASI measurements by their uncertainties, which include varying sensitivities to thermal contrast, as described*

Response: We've changed the text based on the reviewer's suggestion:

Line 223 - 224: This algorithm **weights** IASI measurements by their uncertainties, which include varying sensitivities to thermal contrast as described in

Line 218: *The sentence: "For each season, we were able to achieve sufficiently overlapped IASI pixels through calculating the sum of the unnormalized spatial response function (SRF) of the oversampling results" is not clear. Please clarify: a bit more detail might be helpful.*

Response: We've modified the sentence to clarify the definition of SRF:

Line 226 - 230: For each season, we were able to achieve sufficiently overlapped **Level 2** IASI pixels **for each Level 3 grid** through calculating the sum of the unnormalized spatial response function (SRF) of the oversampling results. **A large sum of unnormalized SRF means the Level 3 grid is covered by more Level 2 pixels.** Sun et al. 2018 **and** Wang et al. 2021 **have a detailed description of SRF.**

Line 229: *Unlike simple linear regressions,*

Response: We've changed the text based on the reviewer's suggestion:

Line 241: **Unlike** simple linear regression

Line 236: *For the initial analysis, we first used the simplest method for comparing ...*

Response: We've changed the text based on the reviewer's suggestion:

Line 252: For the initial analysis, we first **used** the simplest **method for** comparing the satellite measurements with ground observations.

Line 237: *for each AMoN site, we average all IASI observations within a given radius of the site during the AMoN sampling time frame (2 weeks)*

Response: We've changed the text based on the reviewer's suggestion:

Line 253 - 254: In other words, for each AMoN site, **we** average all IASI observations within a given radius of the AMoN site **during** the sampling time frame (2 weeks) for comparison and refer to that radius as a spatial window.

Line 239: *between the two datasets*

Response: We've changed the text based on the reviewer's suggestion:

Line 256: between the two **datasets**

Line 250: *and the number of IASI pixels*

Response: We've changed the text based on the reviewer's suggestion:

Line 267: and **the** number of IASI pixels

Line 254: *or in regions*

Response: We've changed the text based on the reviewer's suggestion:

Line 267: or **in** regions

Figure 1: *label each plot with the AMoN site location*

Response: All of these example plots are based on data from one AMoN site. We've added the AMoN site location in the figure caption:

Line 297: Figure 1. Examples of IASI data temporal coverage over the biweekly AMoN sampling period **for an AMoN site in Yosemite National Park, California (CA 44).**

Line 267: *the 2-week AMoN integration period, (using a 25 km spatial window), could affect the results.*

Response: We've changed the text based on the reviewer's suggestion:

Line 284: the 2-week AMoN integration period **(using a 25 km spatial window), could affect the results.**

Line 276: *as representative as*

Response: We've changed the text based on the reviewer's suggestion:

Line 292: to be **as** representative **as**

Line 281: *for most days*

Response: We've changed the text based on the reviewer's suggestion:

Line 298: for most **days** of

Line 285: *To this end, we explore the dependence of the correlation between IASI and AMoN on the IASI data temporal coverage of the 2-week sampling period and total number of IASI pixels within the 2-week AMoN sampling period, using the 25 km spatial window.*

Response: We've changed the text based on the reviewer's suggestion:

Line 301 – 302: To this end, we explore the **dependence of the correlation between IASI and AMoN on** IASI data's temporal coverage of the 2-week sampling period and total number of IASI pixels within the 2-week AMoN sampling period, using the 25 km spatial window.

Line 288: *The impact of temporal coverage and the number of IASI pixels within the sampling period are*

Response: We've changed the text based on the reviewer's suggestion:

Line 304: The impact of different temporal averaging and **the** number of IASI pixels

Line 314: *For each AMoN site, we repeated the two different sampling strategies 100 times*

Response: We've changed the text based on the reviewer's suggestion:

Line 332: For each AMoN site, we **repeated** the two different sampling strategies 100 times

Line 361: *Temporal averaging and regridding approaches, such as tessellation oversampling and physical oversampling, are common methods used to achieve higher spatial resolution*

Response: We've changed the text based on the reviewer's suggestion:

Line 381 - 383: The temporal averaging **and regridding approaches**, such as the tessellation oversampling and physical oversampling, **are** common **methods** to achieve **higher** spatial resolution by sacrificing the temporal resolution.

Line 364: *neglect the interannual variability and calculate the multi-year averaged IASI NH<sub>3</sub> concentrations, both annual and seasonal, using the 25 km*

Response: Figure 4 shows multi-year averaged NH<sub>3</sub> seasonality comparison results between AMoN sites and the IASI observations using 25 km spatial window, which means we ignore the interannual variability of NH<sub>3</sub> seasonality and calculate averaged IASI and AMoN NH<sub>3</sub> seasonality during 2008 – 2018. We've changed the text based on the reviewer's suggestion:

Line 384 - 386: Here we neglect the interannual variability **of NH<sub>3</sub> seasonality** and calculate averaged IASI **and AMoN** NH<sub>3</sub> seasonality during 2008 - 2018 using the 25 km spatial window.

Line 366: *coverage and numbers of IASI pixels increase*

Response: We've changed the text based on the reviewer's suggestion:

Line 386: both temporal **coverage** and numbers of IASI pixels **increase**.

Line 393: *The methodology and comparison results in section 3 demonstrate that IASI NH<sub>3</sub> can*

*be used to verify and augment regional NH<sub>3</sub> trends over the last decade. Here we will compare IASI NH<sub>3</sub> trends with the AMoN observed NH<sub>3</sub> trends in the CONUS region over the last decade.*

Response: We've changed the text based on the reviewer's suggestion:

Line 420 - 421: The methodology and comparison results in section 3 demonstrate that IASI NH<sub>3</sub> can be used to **verify and augment** regional NH<sub>3</sub> trends over the last decade.

Line 398: *from Indianapolis*

Response: We've changed the text based on the reviewer's suggestion:

Line 426: from Indianapolis

Figure 5: *shouldn't the caption read "2008-2018 trends in monthly averaged NH<sub>3</sub>"?*

Response: Yes. We have changed the as appropriate:

Line 432: 2008 – 2018 **trends in** monthly averaged NH<sub>3</sub>

Line 417: *Remove the sentence starting with "The absolute" as this information is presented in the next paragraph.*

Response: We've deleted the text based on the reviewer's suggestion.

Line 433: *Analyzing NH<sub>3</sub> hotspots,*

Response: We've changed the text based on the reviewer's suggestion:

Line 468: **Analyzing** NH<sub>3</sub> hotspots

Line 434: *indicating that the regions with the largest emissions are also seeing concentrations increasing with time.*

Response: We've changed the text based on the reviewer's suggestion:

Line 470: indicating that the regions of the largest emissions sources are also **seeing** increasing concentrations over time.

Line 436: *smaller than the trend in the CONUS median*

Response: We've changed the text based on the reviewer's suggestion:

Line 472: are smaller **than** the trend in **the** CONUS median.

Line 437: *higher than the trend in the CONUS median*

Response: We've changed the text based on the reviewer's suggestion:

Line 473: are higher **than** the **trend in the** CONUS median.

Line 438: *define column-area weighting*

Response: We've changed the text based on the reviewer's suggestion:

Line 474: The top 10 NH<sub>3</sub> hotspots in CONUS regarding column-area weighting (NH<sub>3</sub> column times the area)

Line 441: *see the smallest changes.*

Response: We've changed the text based on the reviewer's suggestion:

Line 478: *see the smallest changes.*

Line 456: *in the eastern US*

Response: We've changed the text based on the reviewer's suggestion:

Line 492: *in the eastern US*

Line 457: *western US and the Northeast*

Response: We've changed the text based on the reviewer's suggestion:

Line 493: *the Northeast US*

Line 487: *add some text like: (Wang et al., 2021), a gap that IASI data can fill.*

Response: We've changed the text based on the reviewer's suggestion:

Line 525: are not located in highly populated urban regions (Wang et al., 2021), *a gap that IASI data can fill.*

Line 488: *the cumulative distribution of the CONUS population as a function of the distance from an AMoN site.*

Response: We've changed the text based on the reviewer's suggestion:

Line 526: Fig. 9a shows *the cumulative distribution of the US population as a function of the distance from an AMoN site.*

Line 493: *mobile sources and trends in population centers.*

Response: We've changed the text based on the reviewer's suggestion:

Line 531: from mobile sources *and trends in population centers.*

Line 502: *in total account for more than seventy million people*

Response: We've changed the text based on the reviewer's suggestion:

Line 540: in total *account for more than seventy million people*

Figure 9: *Cumulative distribution of CONUS population as a function of distance from an AMoN site.*

Response: We've changed the text based on the reviewer's suggestion:

Line 558: Figure 9. (a) *Cumulative distribution of CONUS population as a function of distance from the nearest AMoN site*

Line 517: *The temporal coverage of the IASI data during the two week AMoN sampling period is the controlling factor of the correlation between the IASI and AMoN measurements, presumably because of the large day-to-day variability of NH<sub>3</sub>.*

Response: We've changed the text based on the reviewer's suggestion:

Line 570 - 572: **The temporal coverage of IASI data during the 2-week AMoN sampling period is the controlling factor of the correlation between IASI and AMoN measurements,** presumably because of the large day-to-day variability of NH<sub>3</sub>.

Line 521: *the IASI NH<sub>3</sub> product*

Response: We've changed the text based on the reviewer's suggestion:

Line 574: **the** IASI NH<sub>3</sub> product

Line 522: *shown the unique role*

Response: We've changed the text based on the reviewer's suggestion:

Line 577: has shown the unique role

Line 530: *as well as similar spatial patterns.*

Response: We've changed the text based on the reviewer's suggestion:

Line 584: as well as similar spatial **patterns**

Line 531: *show the largest increases in the Midwest and eastern U.S., with a moderate correlation between the IASI and AMoN trends for the entire CONUS.*

Response: We've changed the text based on the reviewer's suggestion:

Line 585 – 586: Both IASI and AMoN show largest NH<sub>3</sub> **increases** in the Midwest and eastern U.S., with a moderate **correlation between the IASI and AMoN trends for the entire CONUS** (r = 0.66).

Line 535: *deposition in most regions in the U.S.;*

Response: We've changed the text based on the reviewer's suggestion:

Line 589: deposition in **most regions** in the U.S.

Line 536: *(2016), which will have adverse impacts*

Response: We've changed the text based on the reviewer's suggestion:

Line 591: **which will have** adverse impacts

Line 540: *(cropland dominated) and in summer in the western U.S. (feedlot dominated), highlighting the impacts*

Response: We've changed the text based on the reviewer's suggestion:

Line 595: in the Midwest and eastern U.S. (cropland dominated) **and** in summer in the western U.S. (feedlot dominated)

Line 543: *for characterizing NH<sub>3</sub> magnitude*

Response: We've changed the text based on the reviewer's suggestion:

Line 599: **for characterizing** NH<sub>3</sub> magnitude

Line 547: *communities with limited resources*

Response: We've changed the text based on the reviewer's suggestion:

Line 602: communities **with limited** resources
